# Supplementary material
Source: publisher figshare collection journal article supplement (https://acs.figshare.com/ndownloader/files/4712272)
Supplement: Supplementary file 1 [file 4712272]

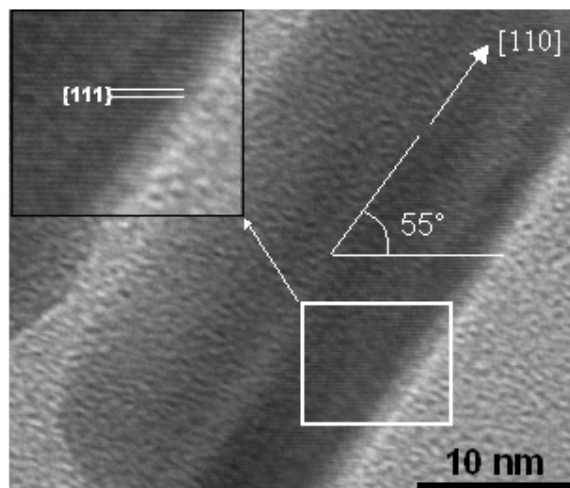

**Figure S1.** TEM image of a Pd nanorod viewed down the  $\langle 110 \rangle / \langle 111 \rangle$  zone showing  $\{111\}$  fringes (inset: HRTEM image) at an angle of  $55^\circ$  to the  $[110]$  axis of elongation. This lattice image is consistent with the fivefold-symmetry of the Pd nanorods.

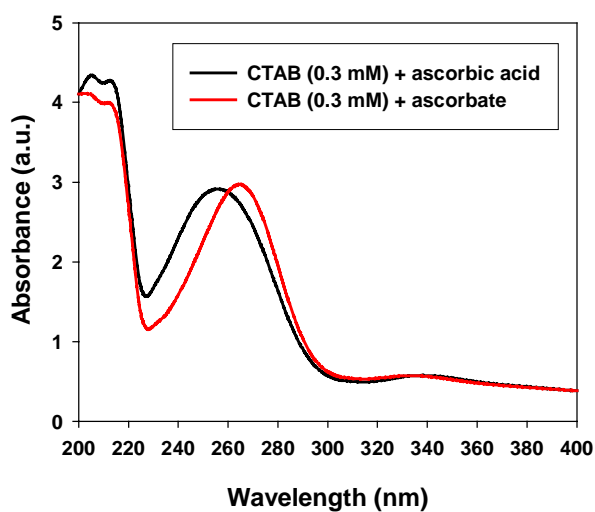

**Figure S2.** UV spectra of the CTAB-ascorbic acid and CTAB-ascorbate mixtures [CTAB: 50 mL of CTAB 0.024 M, 2.1 mL of sodium ascorbate or ascorbic acid 8 mM]. A 10 nm red-shift is observed using ascorbate showing a stronger interaction between the cationic CTAB surfactant and ascorbate.
